# Supplementary material
Source: Research Square preprint supplement (doi:10.21203/rs.3.rs-9466360/v1)
Supplement: Supplementary file 1 [file 327d5f818c68d15781e4bffb.docx]

**Hydrodynamic properties of plasmid DNA from physical and ionic treatment influence *E. coli* transform**

# Achilles E. Espaldon a, b, c *, Stephen G. Sabinay d, Ignacio A. Catelo e, Noel Peter B. Tan a, b

a Center for Advanced New Materials, Engineering, and Emerging Technologies (CANMEET), University of San Agustin, Iloilo City, Philippines

b Department of Chemical Engineering, University of San Agustin, Iloilo City, Philippines

c Gregor Mendel Research Laboratories, University of San Agustin, Iloilo City, Philippines

d West Visayas State University, Iloilo City, Philippines

e Department of Human Anatomy, Pamantasan ng Lungsod ng Maynila, Intramuros, Metro Manila, Philippines

* Corresponding author:

Achilles E. Espaldon

Mailing address:

Center for Advanced New Materials, Engineering, and Emerging Technologies (CANMEET), University of San Agustin, 5000 General Luna St.

Iloilo City, Philippines

E-mail: [aeespaldon@gmail.com](mailto:aespaldon@usa.edu.ph)

**Supplementary information**


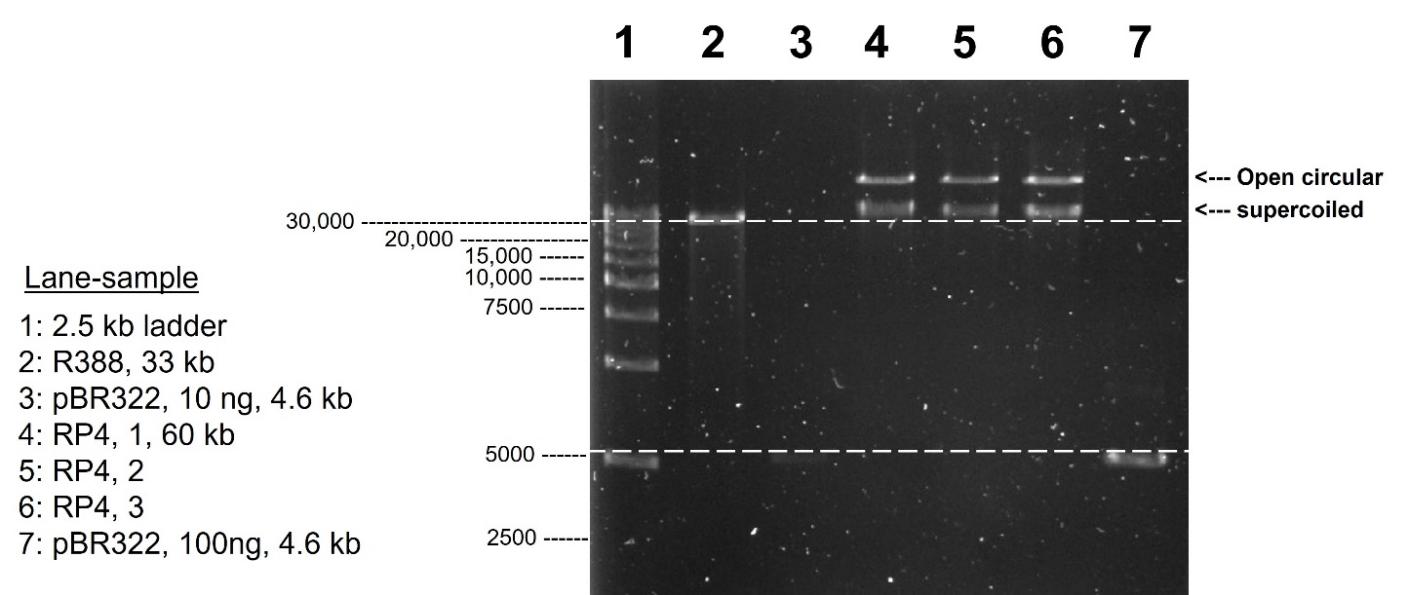


*Fig S1. Agarose gel image of RP4, R388 and pBR322 plasmids.*

**Table S1** Measure of dispersion via range of sizes and SDI peaks for the DLS measurement (RP4)

|  | DH range  (max and min. values), nm | SDI* Peaks, % contribution |
| --- | --- | --- |
| BB-20 | 75.7 (108-32.3) | 152 nm (55%), 2396 nm. (44%) |
| BB-10 | 126.2 (169.9 - 43.7) | 155 nm (45%), 1624 nm. (55%) |
| N | 47.6 (79.9 - 32.3) | 70 nm (14%), 460 nm. (84%) |
| MT-0.3 | 44.8 (68.7 - 23.9) | 89 nm (23%), 518 nm. (74%) |
| MT-2 | 19.24 (32.3 – 13.1) | 163 nm (59%), 2699 nm. (25%) |
| MT-5 | 62.2 (79.9 - 17.7) | 134 nm (65%), 2329 nm. (32%) |

**- size distribution by intensity*

**Table S2** Mean RT-qPCR Ct values comparison of amplified *traG* amplicons comparing N and BB-10 (plasmid concentration, 0.6 ng/*u*L, n > 3)

|  |  | Mean * | SD |
| --- | --- | --- | --- |
|  | N | 19.2 | 1.196 |
|  | BB-10 | 19.3 | 0.31 |
|  | *p* value | 0.89 (not significant) | |

* - two-tailed paired *t-*test, *p* < 0.05
