# Supplementary material
Source: Research Square preprint supplement (doi:10.21203/rs.3.rs-9466360/v1)
Supplement: Supplementary file 2 [file ca0855cb8a562fb2f6976a2e.docx]

**Tables**

**Table 1** Plasmid and host used in the study.

| Plasmid DNA (size)/ Bacterial stain | Group/ Genotype | Phenotype | Source |
| --- | --- | --- | --- |
| RP4 (60 kb) | IncPα | AmpR, KanR, TetR | (Kawano et al., 2020) |
| pBR322 (4.6 kb) | *n.a.* | AmpR | Nippon gene, Japan |
| *E. coli* DH5α | F-, Φ80d*lacZ*⊿M15, ⊿*lacZYA-argF,* U169, *hsdR*1,*recA*1, *endA*1,*relA*1,*deoR*,*supE*44,*thi*-1,*gyrA*96, λ- | NalR (gyrA96) | Nippon gene, Japan |
